# Supplementary material for: Rate-selected growth of ultrapure semiconducting carbon nanotube arrays
Source: PubMed Central journal article supplement (PMC6775125; doi:10.1038/s41467-019-12519-5), 2019-10-02
Supplement: 41467_2019_12519_MOESM1_ESM.pdf [file 41467_2019_12519_MOESM1_ESM.pdf]

Supplementary Materials for  
Rate-selected growth of ultrapure semiconducting carbon  
nanotube arrays

Zhu et al.

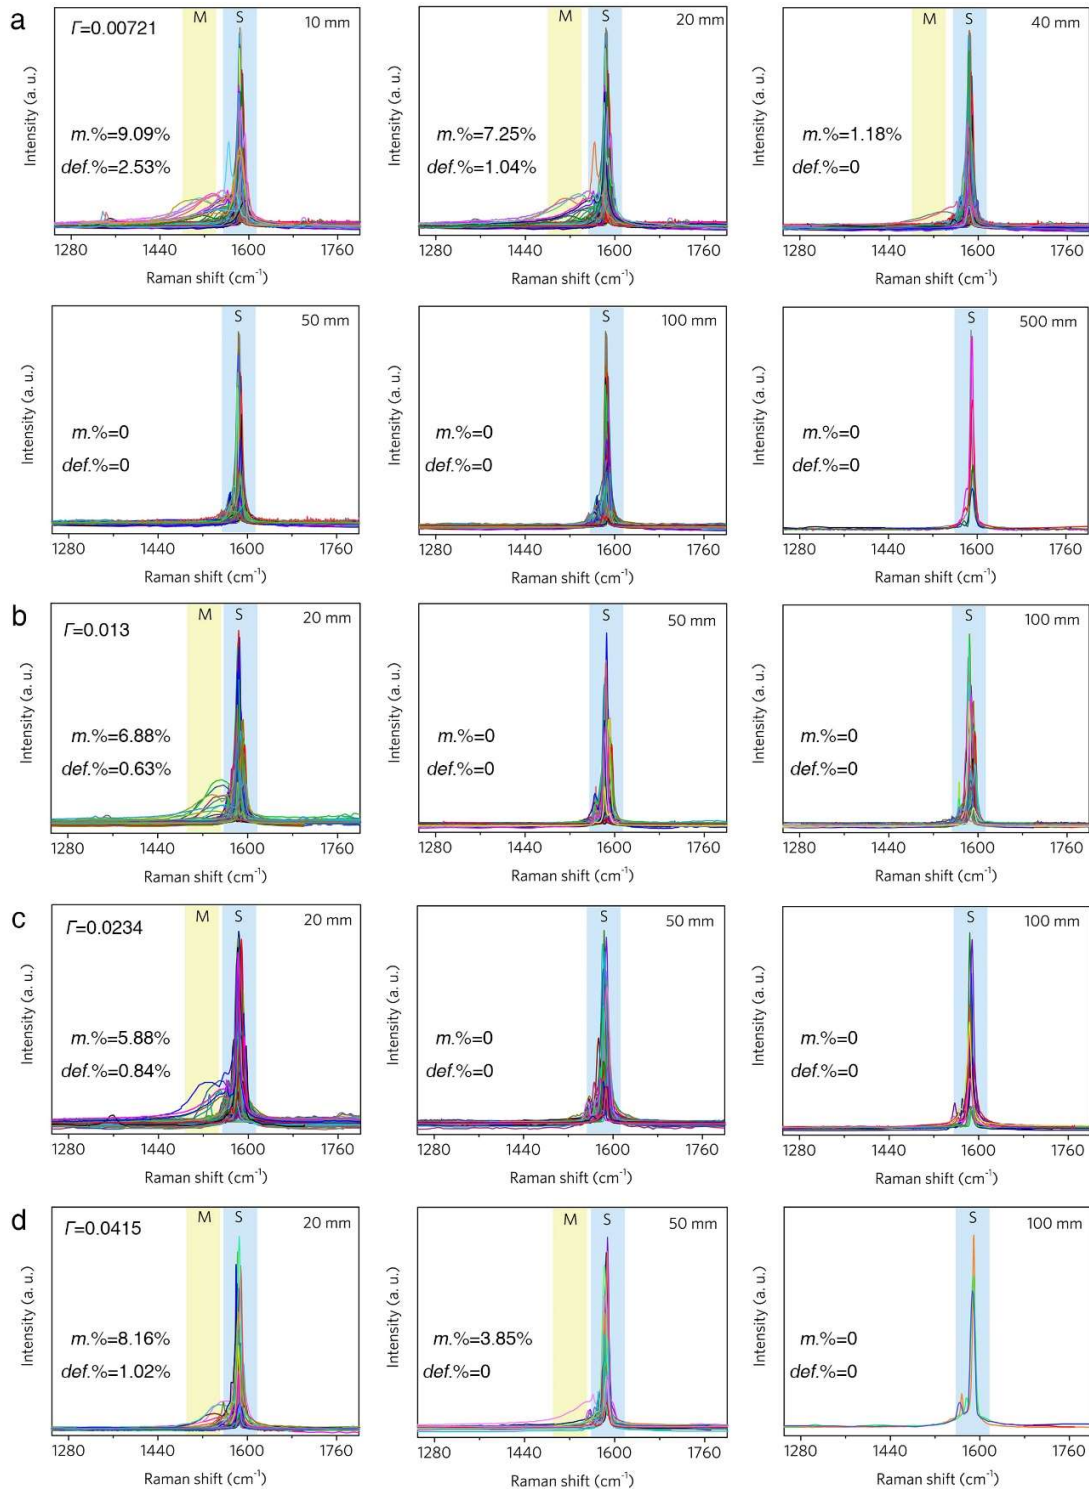

**Supplementary Figure 1 | Raman spectra at various length of aligned CNTs grown at different conditions. a,  $T=1010$  °C,  $w_{H_2O}=0.45\%$ ; b,  $T=1010$  °C,  $w_{H_2O}=0.55\%$ ; c,  $T=980$  °C,  $w_{H_2O}=0.45\%$ ; d,  $T=980$  °C,  $w_{H_2O}=0.55\%$ .  $m.\%$  represents the m-CNT percentage of aligned tubes at specific length while  $def.\%$  denotes the ratio of defective CNTs.**

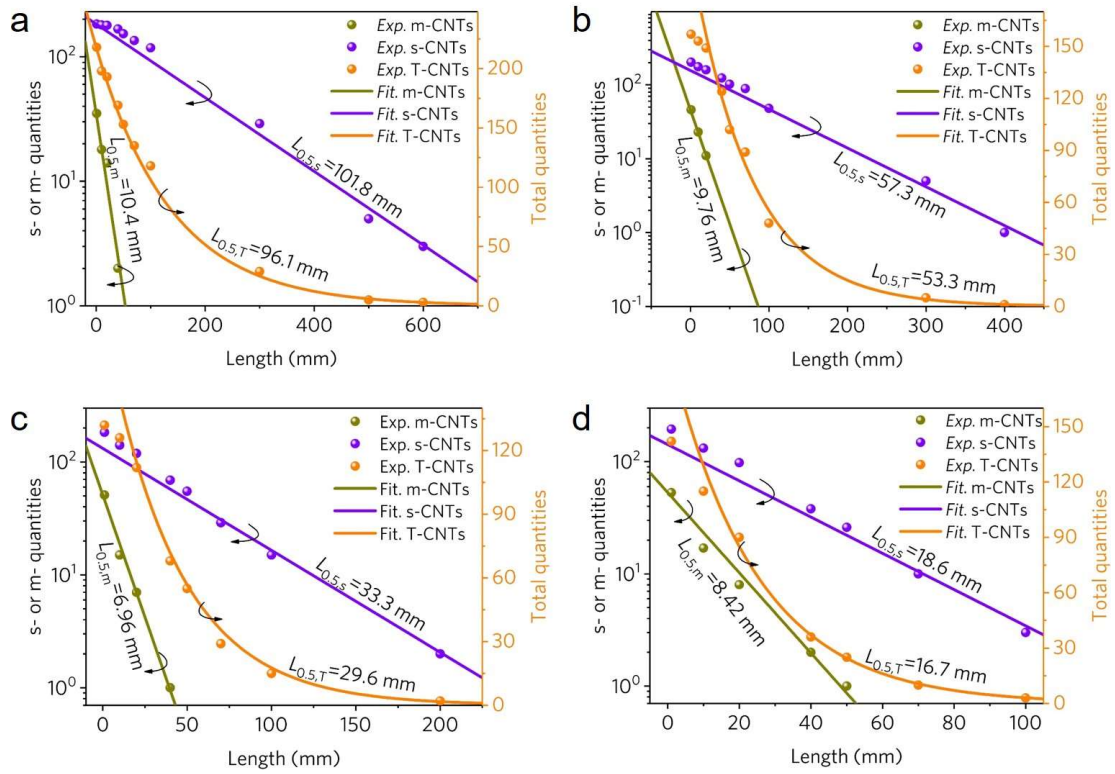

**Supplementary Figure 2 | Exponential decay in quantities of m-, s-, and total CNTs with length.** The CNT quantities were statistically counted based on the corresponding samples shown in Supplementary Figure 1. The s- and m-CNT quantities correspond to the left axis in logarithmic scale while the total CNT quantities correspond to the right axis in normal scale.  $L_{0.5,s}$ ,  $L_{0.5,m}$  and  $L_{0.5,T}$  represent the half length of s-CNTs, m-CNTs and total CNTs, respectively.

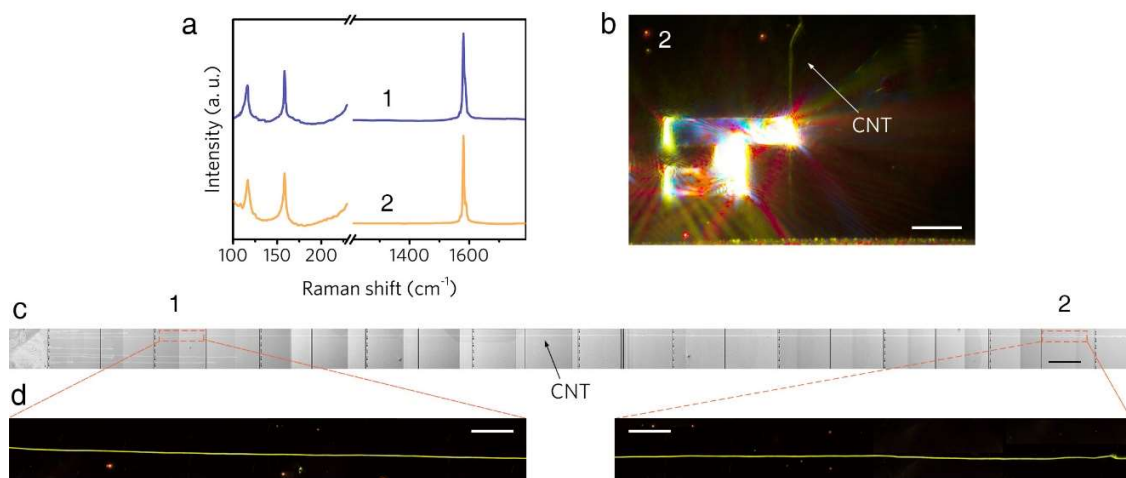

**Supplementary Figure 3 | Chiral consistency of an individual DWCNT longer than 35 mm.** The morphology of the DWCNT was characterized by SEM **c**, with its head and tail visualized in uniform color under resonant Rayleigh scattering **b**, **d**. Also, the head and tail part of the DWCNT possessed the same Raman peak positions without structural defects **a**, further indicating the chiral consistency and structural perfectness of the DWCNT. Scale bars, 20 μm in **b**, **d** and 1 mm in **c**.

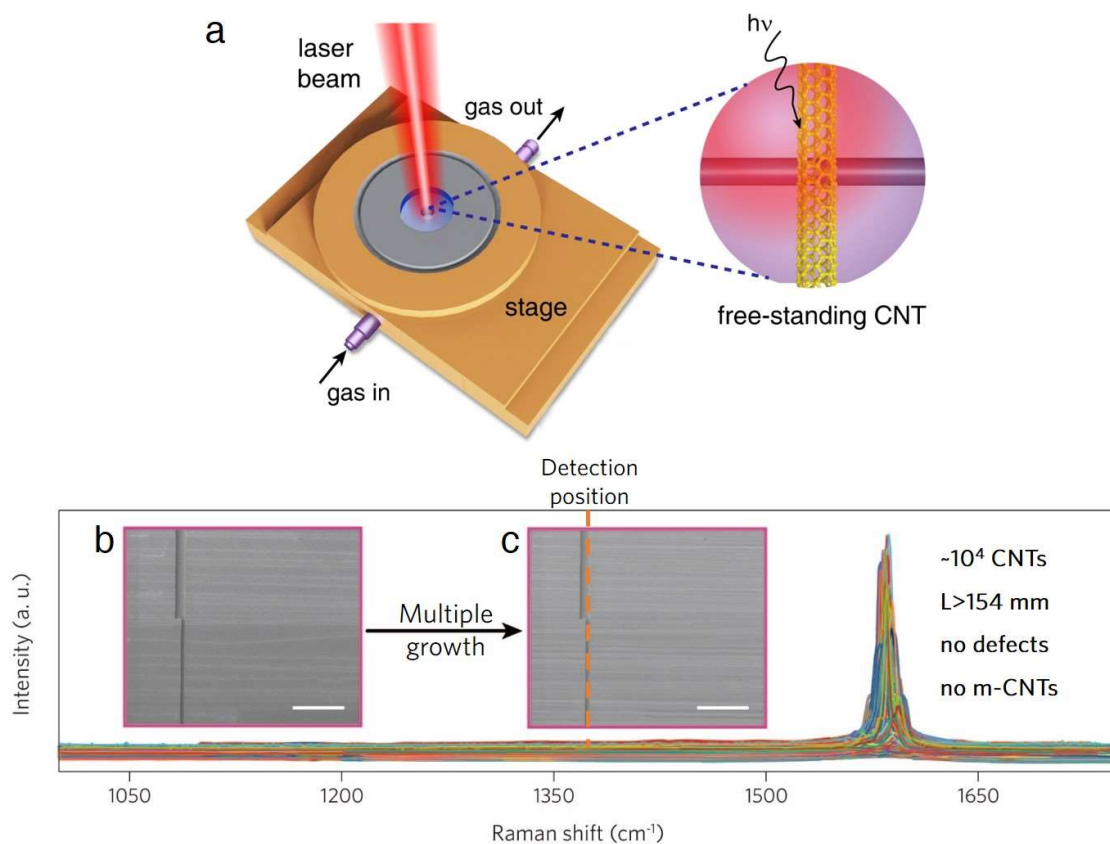

**Supplementary Figure 4 | Micro-Raman measurements of  $\sim 10^4$  CNTs longer than 154 mm.** The aligned CNTs **b** longer than 154 mm were synthesized at condition  $T=1020$  °C,  $w_{H_2O}=0.5\%$ ,  $V_{H_2}: V_{CH_4} = 2:1$ , followed by ten-time multiple growth **c** with the preloaded catalysts. Preceded the sequential micro-Raman measurements on individual CNTs, the as-grown samples encapsulated in a stage **a**, went through an annealing treatment at 450 °C under argon atmosphere, in case of a smear-out on the BWF characteristics caused by O<sub>2</sub>-adsorption-induced Fermi level shifts. These suspended tubes after annealed treatment, which were statistically counted one-by-one, can best exhibit their pristine characteristics with a notably enhanced intensity. Scale bars in **b**, **c** are 300  $\mu$ m.

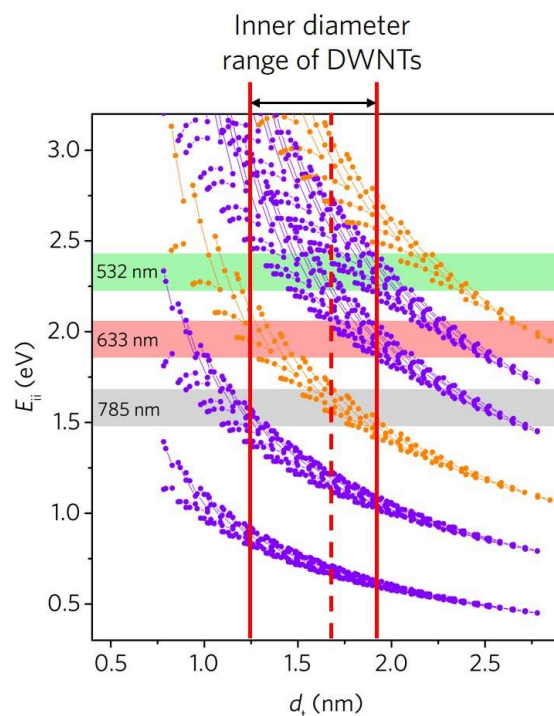

**Supplementary Figure 5 | Resonance of the MWNTs with laser irradiation wavelength.** Normalized Kataura plot: orange (purple) symbols, transition energies for metallic (semiconducting) SWNTs; Rectangular bars, laser excitation energies used in this work; Vertical lines: inner diameter range of DWNTs; Dotted line: predominated inner diameter. Outer diameters of DWNTs distribute in the range of 2.0~3.5 nm while inner ones range from 1.30 to 1.80 nm, which center around 1.7 nm. This corresponds to the  $E_{ii}$  ranges of 1.5~2.0 eV and 2.5~3.0 eV in the Kataura plot regarding the resonance of metallic components. However, the m-CNTs in the  $E_{ii}$  range of 2.5~3.0 eV are mostly families with high indexes ( $2n+m=36, 39, 42$ ), which are seldom found in our as-grown CNTs. Monowavelength lasers (2.33 eV, 1.96 eV, 1.58 eV) have covered most of the common tube families including the major distribution of m-CNTs. Resonance of at least one layer with the laser determines the excitation of both the concentric layers due to quantum coupling.

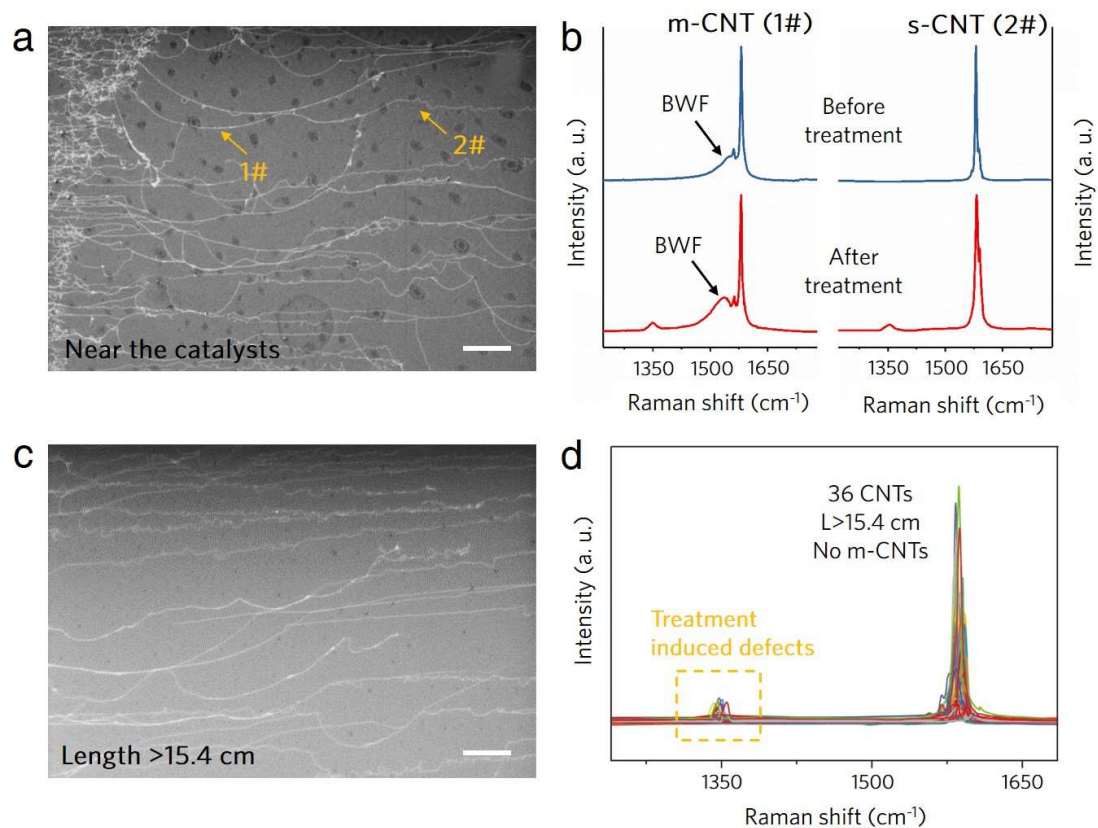

**Supplementary Figure 6** | SEM images of the CNTs near the catalysts **a** and those longer than 154 mm **c** after surfactant treatment. Scale bars, 100  $\mu\text{m}$  for **a** and **c**. **b**, Raman G modes of two typical CNTs near the catalysts before and after surfactant treatment. **d**, A collective of G modes for 36 CNTs longer than 154 mm. An obvious enhancement of BWF intensity after surfactant treatment for a same m-CNT (1# in **b**) validated the efficiency of this method. Therefore, no detection of BWF lineshapes for tubes longer than 154 mm after surfactant treatment verified further the high selectivity of s-CNTs.

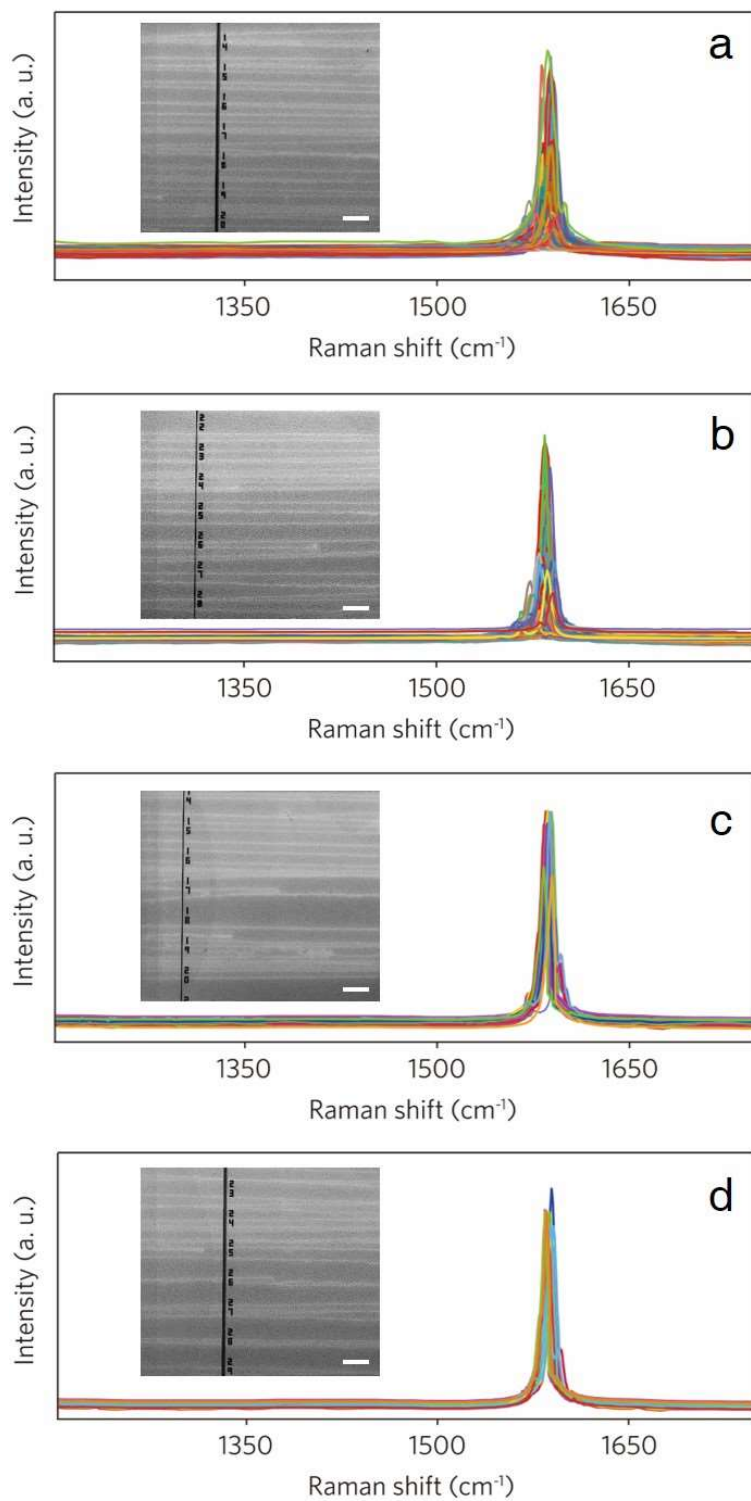

**Supplementary Figure 7 | Raman spectra of CNTs longer than 154 nm synthesized at different conditions. a,  $T=1010\text{ }^{\circ}\text{C}$ ,  $w_{\text{H}_2\text{O}}=0.4\%$ ; b,  $T=1000\text{ }^{\circ}\text{C}$ ,  $w_{\text{H}_2\text{O}}=0.4\%$ ; c,  $T=1010\text{ }^{\circ}\text{C}$ ,  $w_{\text{H}_2\text{O}}=0.5\%$ ; d,  $T=1000\text{ }^{\circ}\text{C}$ ,  $w_{\text{H}_2\text{O}}=0.5\%$ . Scale bars in a-d are 200  $\mu\text{m}$ .**



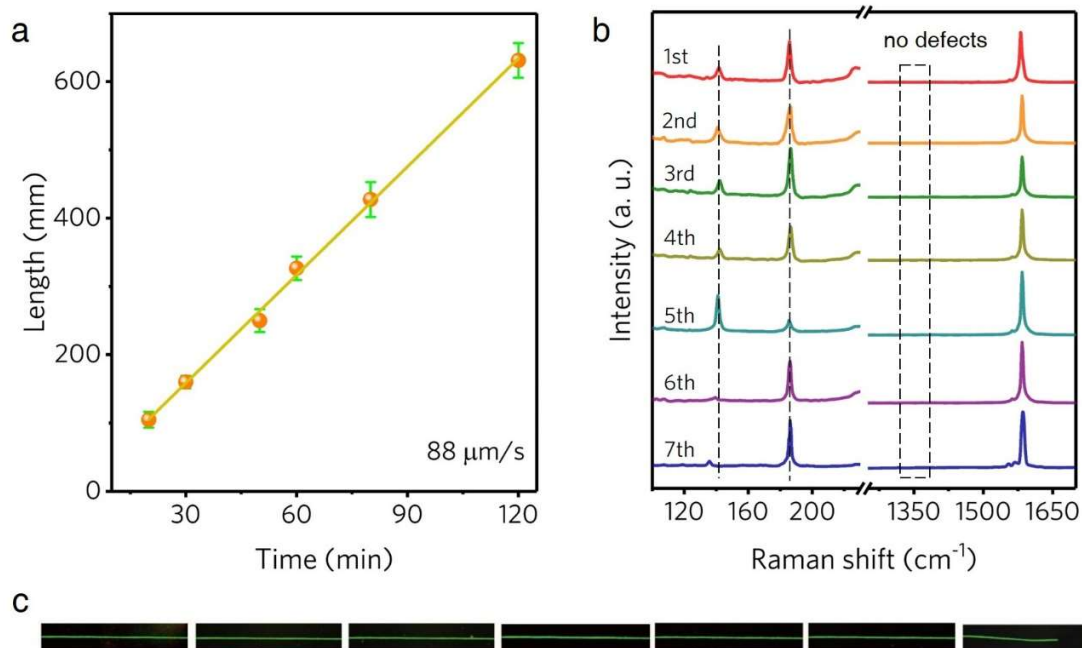

**Supplementary Figure 8 | Characterization of the 650-mm-long CNT.** **a**, Dependence of the average CNT length on their growth time. For CNTs with different length on substrates, only the longest 10 CNTs were taken into consideration for calculating the growth rate. Error bars represent standard deviation of the length for tubes grown at different growth time. **b**, RBM mode waterfall of the longest CNT. Each spectrum was probed from the seven different wafers along the long tube. **c**, Rayleigh images of the 650-mm-long CNT captured from each wafer. Scale bar, 200  $\mu\text{m}$ .

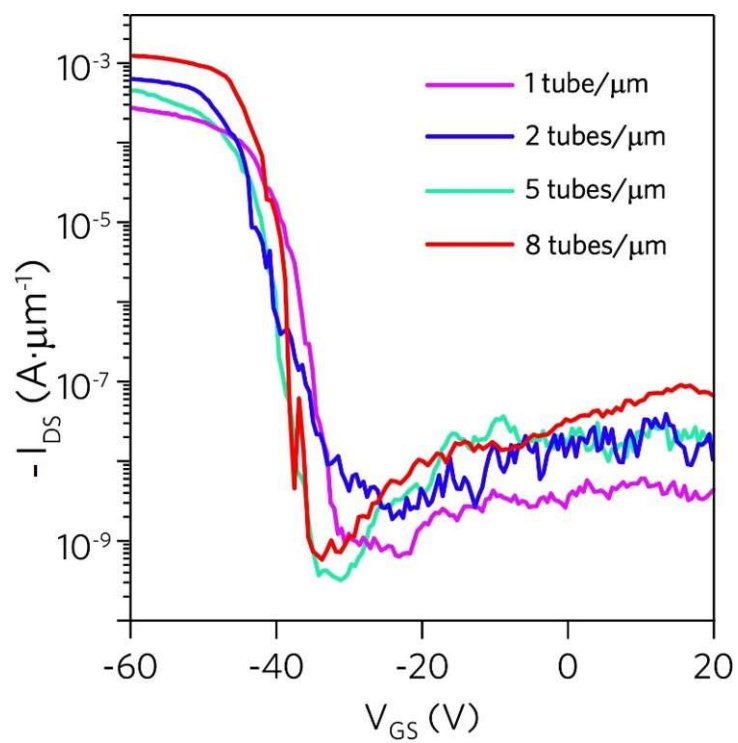

**Supplementary Figure 9** | Transfer characteristics of transistors fabricated on CNTs longer than 154 nm after each growth cycle. The devices were built with interdigitated electrodes driven by a same applied  $V_{DS}$  of -0.1 V.

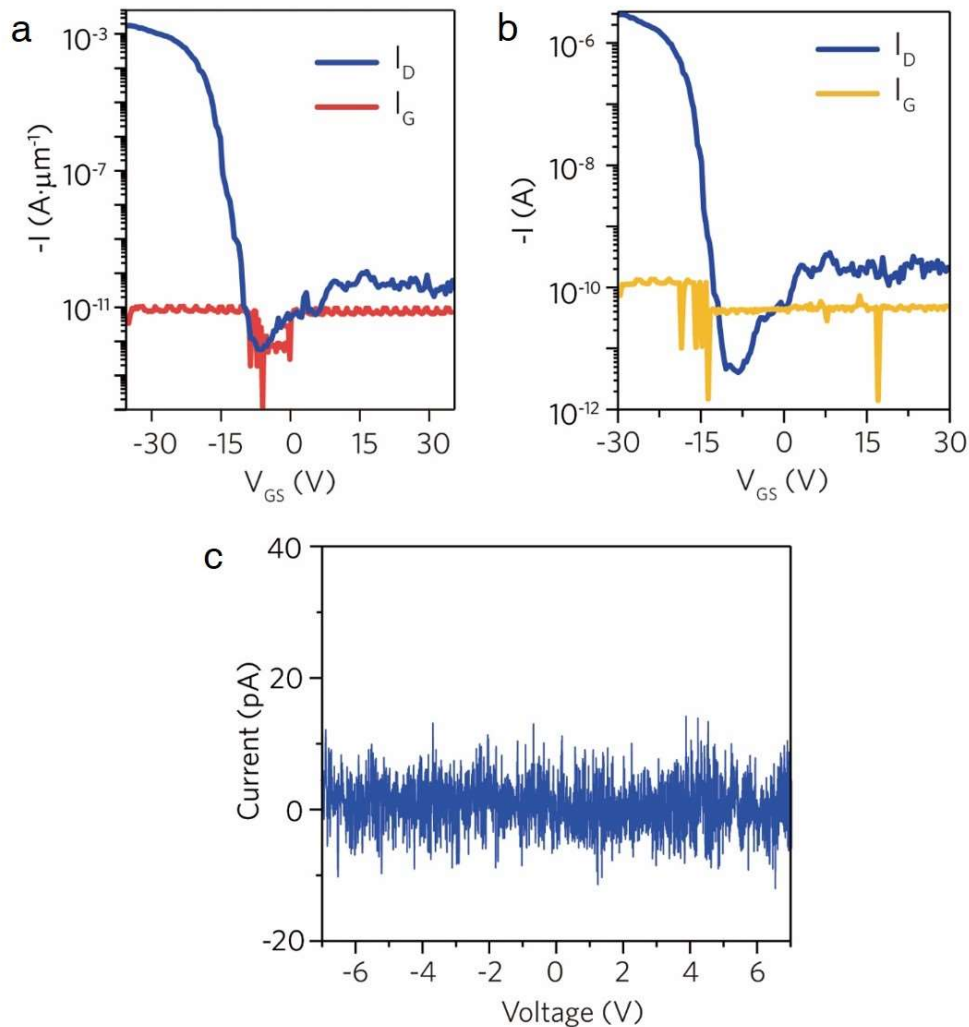

**Supplementary Figure 10** | **a**, the gate current  $I_G$  versus  $V_{GS}$  of the device shown in Fig. 2h where  $I_{DS}$  is also measured as a function of  $V_{GS}$ . The current is width-normalized with applied  $V_{DS}$  of -0.1 V.  $I_G$  couldn't be the result of leakage from the gate. Because it would behave as a resistor conforming to the Ohm's Law when there is current leakage, instead of retaining the positive current direction during the voltage sweeping. We suppose that it might be caused by the capacitance, of which the absolute value depends on multiple factors like scanning rate, scanning direction, etc. The lower  $I_G$  near the current valley can be attributed to this capacitance effect as well, given the lower scan rate (longer integration time) in measuring the ultralow current.  $I_G$  have a limited impact on the on/off ratio due to its similar values to the stable off current. The areal off current can be estimated as 'measured off current±gate current', which still enables the on/off ratio higher than  $10^8$ . **b**, Transfer characteristic of a transistor fabricated on one ultralong CNT plotted in logarithmic scale with applied  $V_{DS}$  of -0.5 V. The corresponding  $I_G$  versus  $V_{GS}$  data is also shown in yellow. **c**, Transfer characteristic measured in transistors without CNTs.

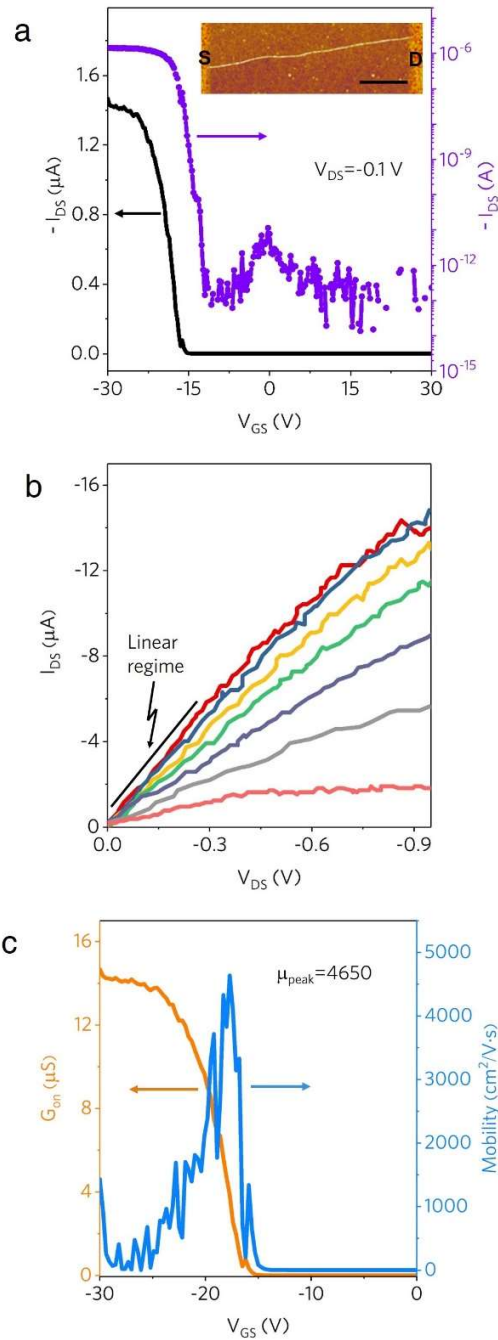

**Supplementary Figure 11 | Electrical performances of a representative transistor. a,** Transfer characteristics of a typical transistor fabricated on a CNT longer than 154 nm with an applied voltage of  $V_{DS}=-0.1$  V, plotted in both linear (lines, left axis) and logarithmic (symbol lines, right axis) scales. Inset, AFM topography of the transistor device structure. Scale bar, 1  $\mu\text{m}$ . **b,** Output characteristic of the transistor measured with ascending  $V_{GS}$  from -11 V to -17 V at a step of -1 V. **c,** The relationship of on-state conductance and mobility versus  $V_{GS}$  as derived from the transfer characteristics.

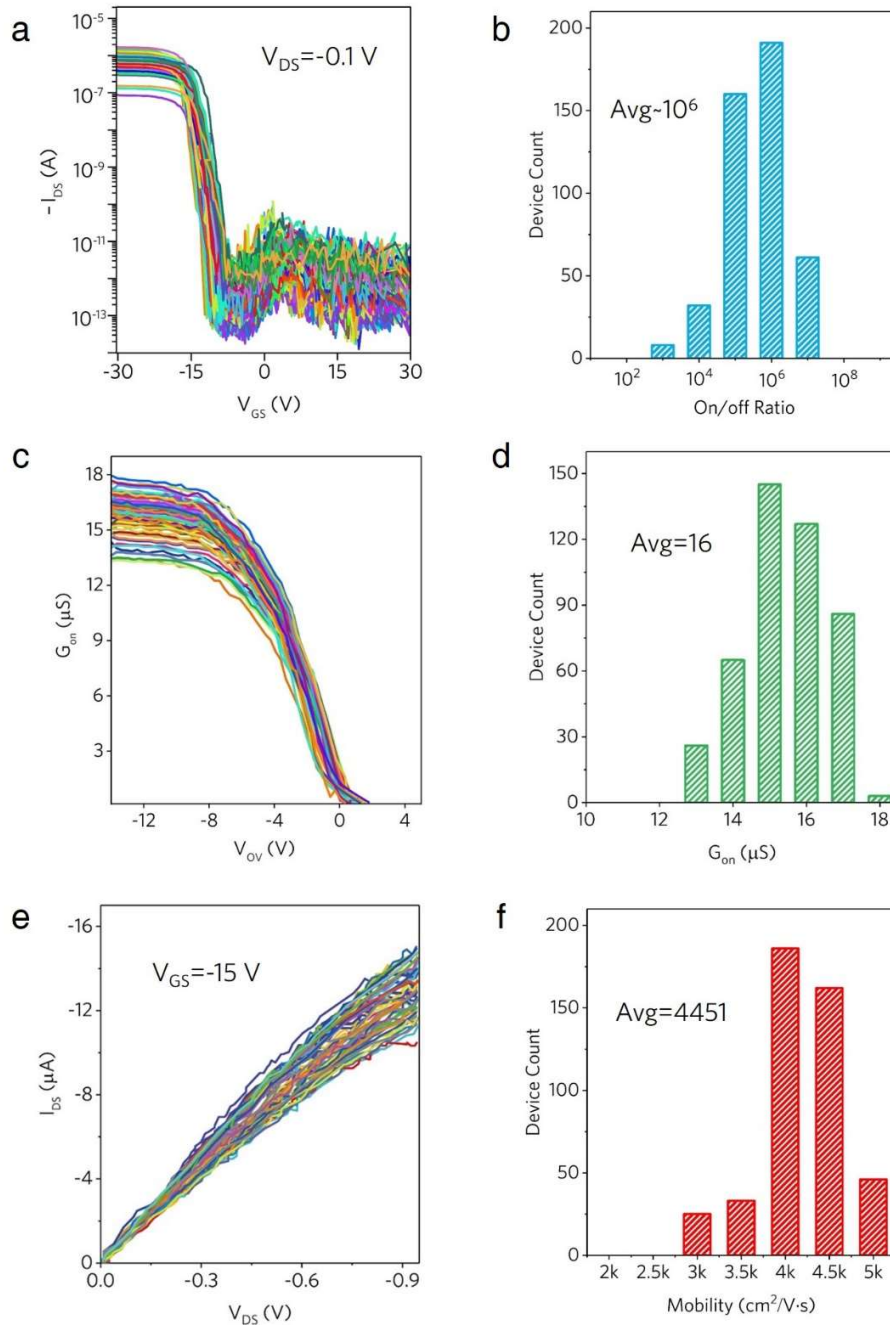

**Supplementary Figure 12 | Statistics of the electrical performances of single-tube transistors.** **a**, Collection of transfer curves measured for 452 transistors each built on an individual CNT with length exceeding 154 nm. **b**, The histogram showing the distribution of on/off ratio as measured in **a**. **c**, Collection of on-state conductance curves extracted from **a**,  $V_{OV}$  denotes how much the gate voltage was applied above the threshold voltage. **d**, The histogram showing the distribution of on-state conductance as measured in **c**. **e**, Collection of output characteristics with an applied  $V_{GS}$  of -15 V. **f**, The histogram showing the distribution of mobility extracted from **a**. Avg. in **b**, **d**, **f** represents the average value.

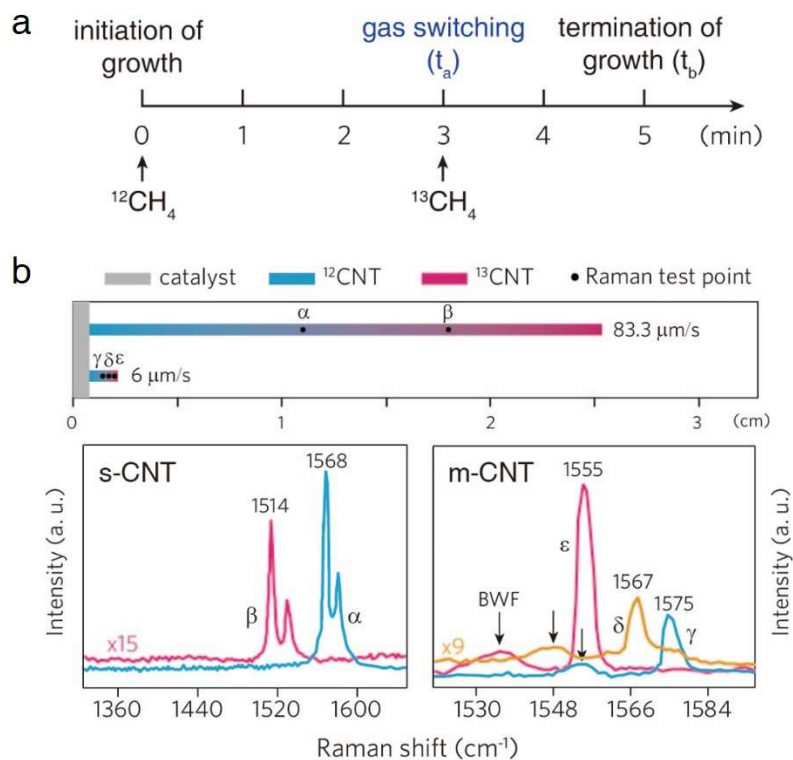

**Supplementary Figure 13** | **a**, Graphic diagram for the isotope switching test. For the first 3 min, the CNTs were synthesized from cracked  $^{12}\text{CH}_4$ , preceded the synthesis with  $^{13}\text{CH}_4$  as the feedstock for the last 2 min. The feedstock was switched to  $^{13}\text{CH}_4$  at  $t_a=3$  min and the reaction was terminated at  $t_b=5$  min. **b**, Schematic of growth rate measurement with the isotope switching method. The bottom panels are G modes of typical s-CNT and m-CNT before and after isotope switching. This shows that an individual s-CNT possess higher growth rate than that of m-CNT.

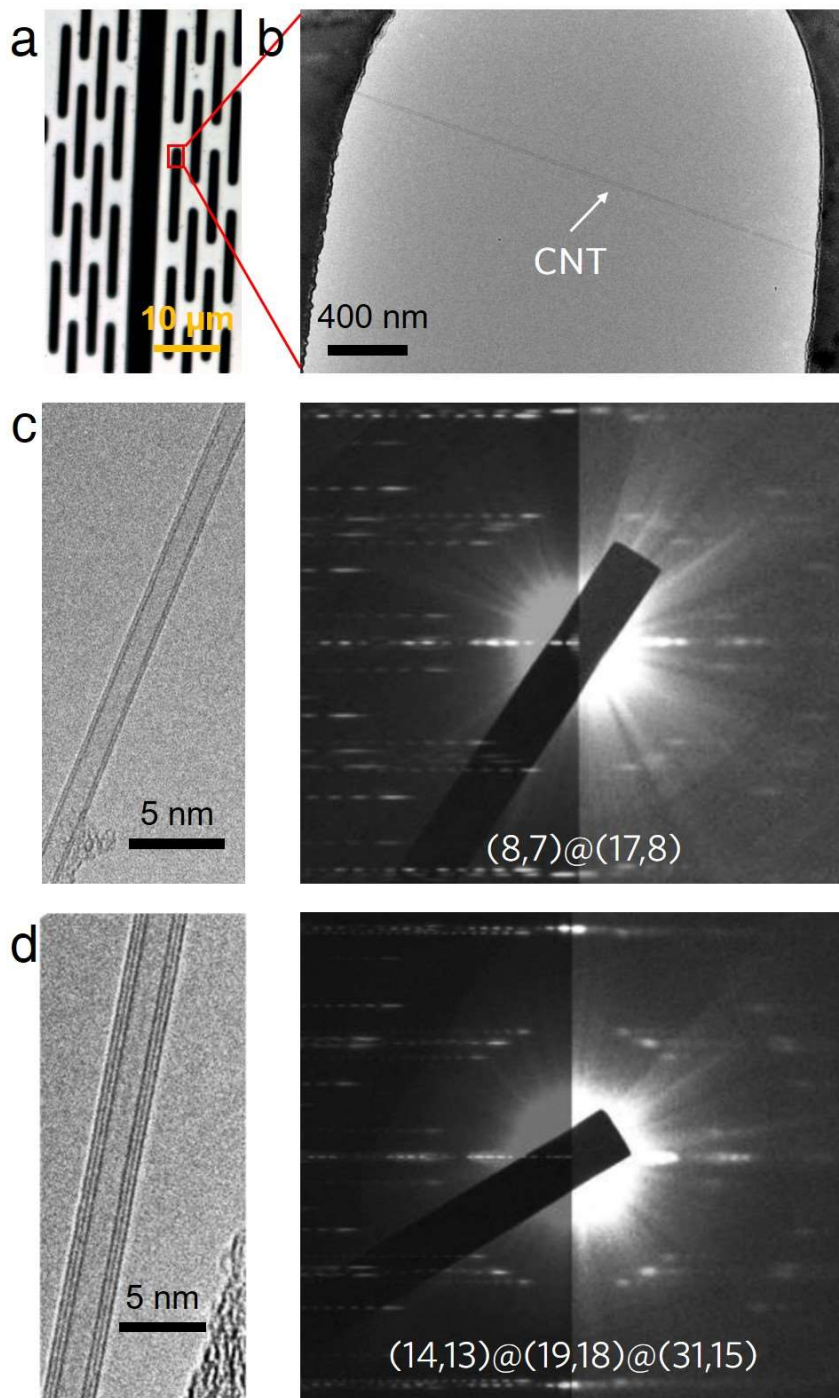

**Supplementary Figure 14 | Assignment of chiral indexes by electron diffraction for ultralong CNTs.** **a**, Optical image of the trenched Si/SiO<sub>2</sub> grid. **b**, Expanded view of the grid as in (a) under TEM. **c**, **d**, TEM images and the corresponding ED patterns of the representative free-standing m-CNT indexed to (8,7)@(17,8) and s-CNT indexed to (14,13)@(19,18)@(31,15).

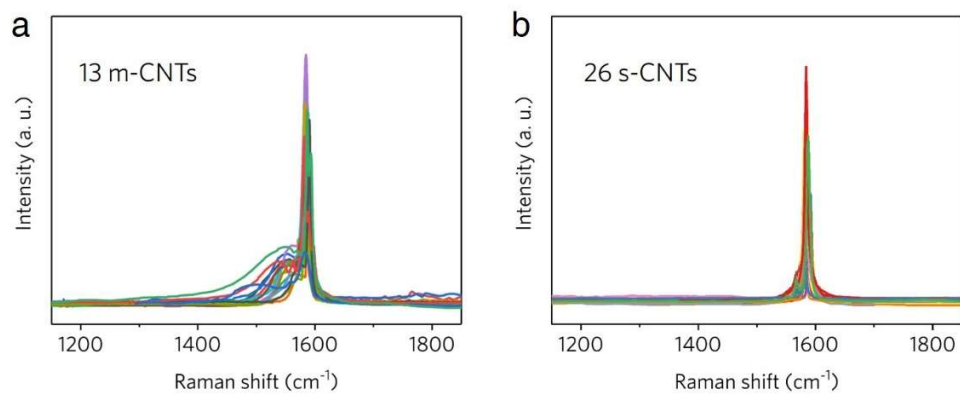

**Supplementary Figure 15** | Raman spectra of the m-<sup>12</sup>CNTs (a) and s-<sup>12</sup>CNTs (b) corresponding to those characterized under TEM.



Supplementary Table 1 | TOF versus bandgap for s-CNTs

| CNT type | TOF (s <sup>-1</sup> ) | n  | m    | d (nm) | θ (°) | E (eV) |
|----------|------------------------|----|------|--------|-------|--------|
| TWNTs    | 1320345                | 14 | 13   | 1.83   | 28.8  | 0.45   |
|          |                        | 24 | 14   | 2.61   | 21.4  | 0.32   |
|          |                        | 29 | 19   | 3.28   | 23.1  | 0.25   |
|          | 1583951                | 11 | 9    | 1.36   | 26.7  | 0.61   |
|          |                        | 19 | 12   | 2.12   | 22.6  | 0.39   |
|          |                        | 26 | 16   | 2.87   | 22.2  | 0.29   |
|          | 1354651                | 15 | 14   | 1.97   | 28.9  | 0.42   |
|          |                        | 20 | 19   | 2.65   | 29.2  | 0.31   |
|          |                        | 32 | 16   | 3.31   | 19.1  | 0.25   |
|          | 1213867                | 14 | 13   | 1.83   | 28.8  | 0.45   |
|          |                        | 19 | 18   | 2.51   | 29.1  | 0.33   |
|          |                        | 31 | 15   | 3.18   | 18.6  | 0.26   |
|          | 1036429                | 21 | 19   | 2.71   | 28.3  | 0.30   |
|          |                        | 30 | 23   | 3.60   | 25.6  | 0.23   |
|          |                        | 33 | 31   | 4.34   | 29.0  | 0.19   |
| 988830   | 30                     | 20 | 3.41 | 23.4   | 0.24  |        |
|          | 44                     | 19 | 4.38 | 17.1   | 0.19  |        |
|          | 48                     | 25 | 5.03 | 19.7   | 0.16  |        |
| DWNTs    | 301901                 | 9  | 7    | 1.09   | 25.9  | 0.76   |
|          |                        | 14 | 12   | 1.76   | 27.5  | 0.47   |
|          | 184984                 | 10 | 5    | 1.04   | 19.1  | 0.80   |
|          |                        | 14 | 12   | 1.76   | 27.5  | 0.47   |
|          | 960300                 | 19 | 12   | 2.12   | 22.6  | 0.39   |
|          |                        | 9  | 7    | 1.09   | 25.9  | 0.76   |
|          | 194296                 | 13 | 12   | 1.70   | 28.7  | 0.49   |
|          |                        | 8  | 7    | 1.02   | 27.8  | 0.81   |
|          | 260735                 | 13 | 6    | 1.32   | 18.0  | 0.63   |
|          |                        | 19 | 8    | 1.88   | 16.8  | 0.44   |
|          | 837482                 | 13 | 8    | 1.44   | 22.2  | 0.57   |
|          |                        | 21 | 7    | 1.98   | 13.9  | 0.42   |
|          | 1675470                | 13 | 9    | 1.50   | 24.0  | 0.55   |
|          |                        | 24 | 7    | 2.21   | 12.4  | 0.37   |
|          | 1320073                | 22 | 11   | 2.28   | 19.1  | 0.36   |
|          |                        | 27 | 17   | 3.01   | 22.5  | 0.27   |
|          | 951086                 | 12 | 8    | 1.37   | 23.4  | 0.60   |
|          |                        | 16 | 14   | 2.04   | 27.8  | 0.40   |
|          | 1634996                | 16 | 12   | 1.91   | 25.3  | 0.43   |
|          |                        | 27 | 10   | 2.60   | 15.1  | 0.32   |
|          | 1386630                | 10 | 9    | 1.29   | 28.3  | 0.64   |
| 18       |                        | 11 | 1.99 | 22.1   | 0.41  |        |
| 1490634  | 20                     | 4  | 1.74 | 8.95   | 0.47  |        |
|          | 20                     | 16 | 2.45 | 26.3   | 0.34  |        |

|         |    |    |      |      |      |
|---------|----|----|------|------|------|
| 954797  | 13 | 9  | 1.50 | 24.0 | 0.55 |
|         | 24 | 7  | 2.21 | 12.4 | 0.37 |
| 1398959 | 22 | 11 | 2.28 | 19.1 | 0.36 |
|         | 27 | 17 | 3.01 | 22.5 | 0.27 |
| 1641445 | 27 | 5  | 2.33 | 8.35 | 0.35 |
|         | 18 | 5  | 1.64 | 11.9 | 0.50 |
| 1764944 | 18 | 5  | 1.64 | 11.9 | 0.50 |
|         | 27 | 5  | 2.33 | 8.35 | 0.35 |
| 1487639 | 24 | 1  | 1.92 | 2.02 | 0.43 |
|         | 20 | 19 | 2.65 | 29.2 | 0.31 |
| 1809276 | 19 | 3  | 1.62 | 7.22 | 0.51 |
|         | 19 | 15 | 2.31 | 26.1 | 0.36 |
| 1583391 | 14 | 12 | 1.76 | 27.5 | 0.47 |
|         | 23 | 13 | 2.47 | 20.9 | 0.33 |
| 1486939 | 18 | 5  | 1.64 | 11.9 | 0.50 |
|         | 27 | 5  | 2.33 | 8.35 | 0.35 |

Supplementary Table 2 | TOF versus bandgap for m-CNTs

| CNT type | TOF (s <sup>-1</sup> ) | n  | m    | d (nm) | θ (°)  | E (eV)  |
|----------|------------------------|----|------|--------|--------|---------|
| TWNTs    | 55741                  | 32 | 18   | 3.43   | 20.8   | 0.24    |
|          |                        | 43 | 19   | 4.31   | 17.4   | 0.00047 |
|          |                        | 50 | 24   | 5.12   | 18.5   | 0.16    |
|          | 105668                 | 18 | 5    | 1.64   | 11.9   | 0.50    |
|          |                        | 24 | 8    | 2.26   | 13.9   | 0.36    |
|          |                        | 35 | 8    | 3.10   | 10.1   | 0.00091 |
|          | 44550                  | 35 | 20   | 3.78   | 21.1   | 0.00061 |
|          |                        | 45 | 19   | 4.46   | 16.8   | 0.18    |
|          |                        | 51 | 24   | 5.19   | 18.3   | 0.00032 |
|          | 201237                 | 49 | 6    | 4.09   | 5.71   | 0.00052 |
| 33       |                        | 13 | 3.22 | 15.9   | 0.26   |         |
|          |                        | 20 | 14   | 2.32   | 24.2   | 0.36    |
| DWNTs    | 487350                 | 8  | 7    | 1.02   | 27.8   | 0.81    |
|          |                        | 17 | 8    | 1.73   | 18.3   | 0.0031  |
|          | 245438                 | 15 | 12   | 1.83   | 26.3   | 0.0027  |
|          |                        | 8  | 6    | 0.95   | 25.3   | 0.86    |
|          | 433125                 | 15 | 10   | 1.71   | 23.4   | 0.48    |
|          |                        | 27 | 6    | 2.38   | 9.83   | 0.0015  |
|          | 149725                 | 20 | 9    | 2.01   | 17.6   | 0.41    |
|          |                        | 27 | 12   | 2.71   | 17.5   | 0.0012  |
|          | 72877                  | 27 | 2    | 2.20   | 3.54   | 0.37    |
|          |                        | 26 | 17   | 2.94   | 23.1   | 0.0010  |
|          | 324736                 | 23 | 10   | 2.29   | 17.2   | 0.36    |
|          |                        | 32 | 11   | 3.03   | 14.3   | 0.00095 |
|          | 362070                 | 15 | 13   | 1.90   | 27.6   | 0.43    |
|          |                        | 31 | 4    | 2.60   | 5.99   | 0.0013  |
|          | 2494800                | 22 | 14   | 2.46   | 22.7   | 0.33    |
|          |                        | 40 | 1    | 3.17   | 1.22   | 0.00087 |
| 372600   | 31                     | 4  | 2.60 | 5.99   | 0.0013 |         |
|          | 15                     | 13 | 1.90 | 27.6   | 0.43   |         |

**Note:** The values in red in Supplementary Tables 1-2 represent the minimum bandgap for the corresponding few-walled CNTs.
